# Supplementary material for: Gadolinium fluoride mesoporous microspheres: controllable synthesis, materials and biological properties
Source: Royal Society of Chemistry journal article supplement (doi:10.1039/c3tb21465f), 2014-01-01
Supplement: c3tb21465f.pdf [file c3tb21465f.pdf]

## **Electronic Supporting Information**

### **Gadolinium fluorides mesoporous microspheres: controllable synthesis, materials and luminescent properties**

Jie Xu, Shili Gai\*, Ping'an Ma, Yunlu Dai, Guixin Yang, Fei He, and Piaoping Yang\*

Key Laboratory of Superlight Materials and Surface Technology, Ministry of Education, College of Materials Science and Chemical Engineering, Harbin Engineering University, Harbin, China. E-mail: [yangpiaoping@hrbeu.edu.cn](mailto:yangpiaoping@hrbeu.edu.cn)

## 1. Study on the leakage of $\text{Gd}^{3+}$ ions and host degradation during delivery

It is very important to study the leakage of  $\text{Gd}^{3+}$  ions and host degradation during delivery, especially for the further utilizing  $\text{NaGdF}_4\text{:Yb/Er}$  microspheres for biomedical use. Firstly, we test the degradation characteristics of the sample by using the buffer solutions. The as-obtained  $\text{NaGdF}_4\text{:Yb/Er}$  spheres dispersed in the buffer solution ( $\text{pH} = 7.0$ ) at  $37\text{ }^\circ\text{C}$  with slow stirring for a week. Then the dispersions were centrifuged and dried at  $60\text{ }^\circ\text{C}$  for 12 h for further characterization. From the results of XRD, SEM and EDS, it can be known that the product after immersion treatment is still  $\text{NaGdF}_4\text{:Yb/Er}$  with original morphology and structure.

Then the supernatant from the immersion treatment can be further analyzed for the leakage of  $\text{Gd}^{3+}$  ions. By adding appropriate amount of NaOH, turbid solution and  $\text{Gd}(\text{OH})_3$  precipitate cannot be found. ICP analysis also cannot detect the  $\text{Gd}^{3+}$  ions. It thus can be inferred that very little even none free  $\text{Gd}^{3+}$  ions can dissociate from the host. On the other hand, due to the complete translation of  $\text{Gd}(\text{OH})\text{CO}_3$  after the hydrothermal treatment at  $160\text{ }^\circ\text{C}$  for 8 h, the obtained  $\text{NaGdF}_4\text{:Yb/Er}$  was quite stable and hardly dissociated in PBS at  $37\text{ }^\circ\text{C}$ .

## 2. Study on acid compatibility of $\text{NaGdF}_4\text{:Yb}^{3+}/\text{Er}^{3+}$ mesoporous spheres

To test the acid compatibility of  $\text{NaGdF}_4\text{:Yb}^{3+}/\text{Er}^{3+}$  mesoporous spheres, it is very important to study the leakage of  $\text{Gd}^{3+}$  ions in acid environment. Firstly, we test the degradation characteristics of the sample by using the acid solutions. The as-obtained  $\text{NaGdF}_4\text{:Yb}^{3+}/\text{Er}^{3+}$  spheres dispersed in the buffer solution ( $\text{pH} = 4.0$ ) at  $37\text{ }^\circ\text{C}$  with slow stirring for a week. Then the dispersions were centrifuged and dried for further characterization. From the results of XRD, SEM and EDS, it can be known that the product after immersion treatment is still  $\text{NaGdF}_4\text{:Yb}^{3+}/\text{Er}^{3+}$  with original morphology and structure. Then the supernatant from the immersion treatment can be further analyzed for the leakage of  $\text{Gd}^{3+}$  ions. By adding enough amount of NaOH, turbid solution and  $\text{Gd}(\text{OH})_3$  precipitate cannot be found. It can declare very little even none free  $\text{Gd}^{3+}$  ions can dissociate from the host.

### 3. Supporting figures

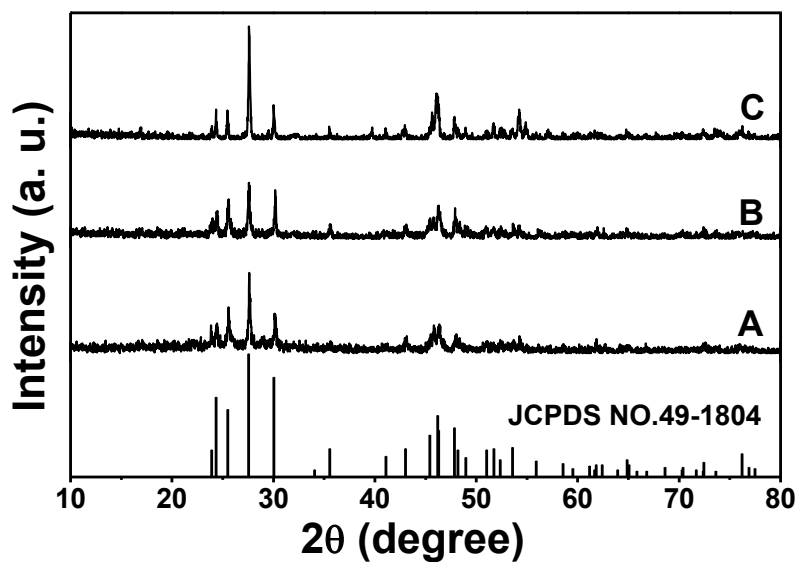

**Fig. S1** XRD patterns of the product obtained at  $160^\circ\text{C}$  for 8 h: (A) pure  $\text{GdF}_3$ , (B)  $\text{GdF}_3:2\%\text{Eu}^{3+}$ , (C)  $\text{GdF}_3$  annealed at  $550^\circ\text{C}$  for 3 h and the standard data of  $\text{GdF}_3$  (JCPDS No. 49-1804) as a reference.

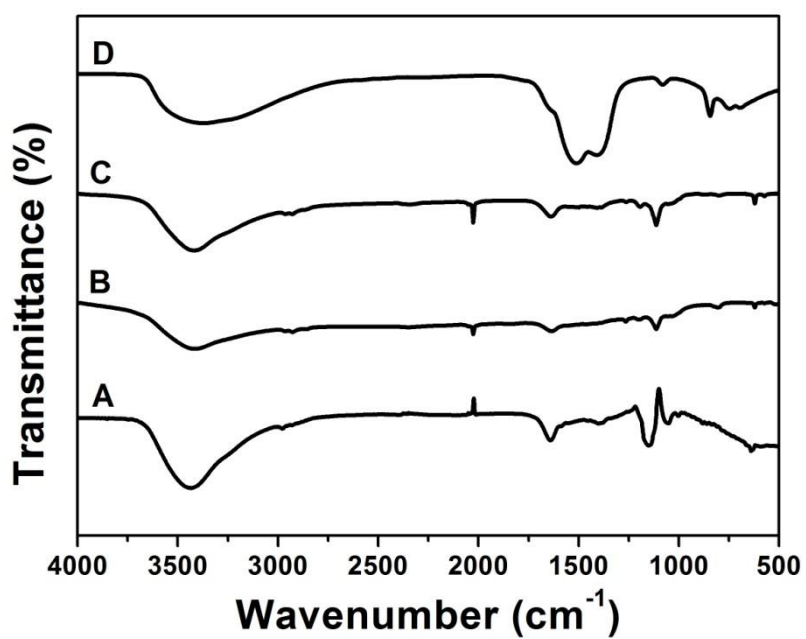

**Fig. S2** FT-IR spectra of GdF<sub>3</sub> (A), Na<sub>5</sub>Gd<sub>9</sub>F<sub>32</sub> (B), NaGdF<sub>4</sub> (C) and Gd(OH)CO<sub>3</sub> (D).

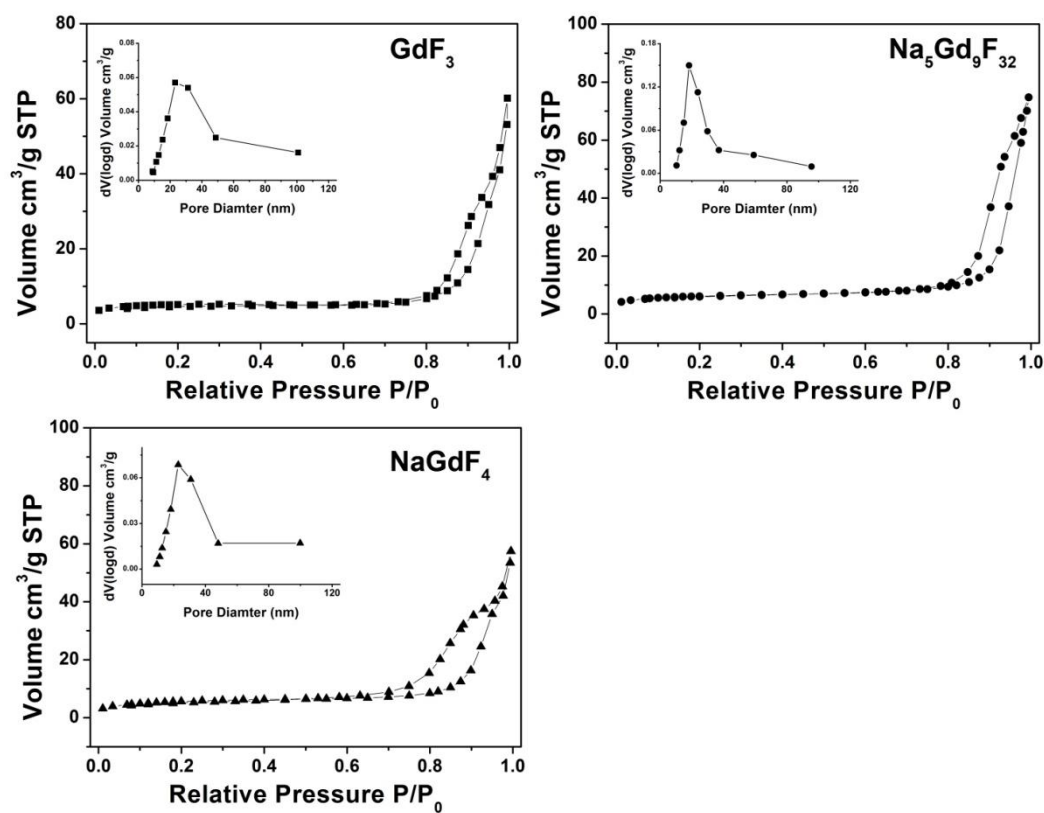

**Fig. S3** N<sub>2</sub> adsorption/desorption isotherms and corresponding pore size distribution (insets) of GdF<sub>3</sub>, Na<sub>5</sub>Gd<sub>9</sub>F<sub>32</sub> and NaGdF<sub>4</sub> mesoporous microspheres.

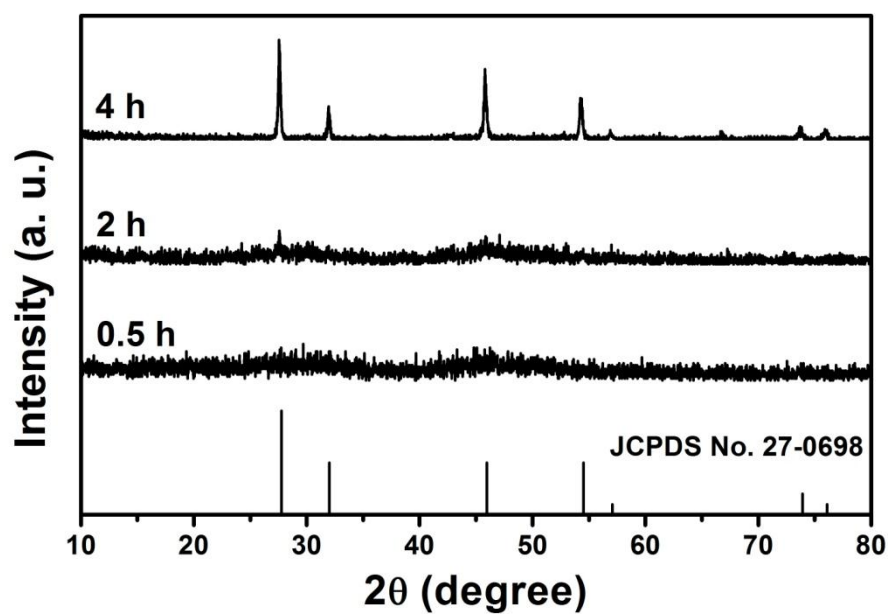

**Fig. S4** XRD patterns of  $\text{Na}_5\text{Gd}_9\text{F}_{32}$  prepared at  $160\text{ }^\circ\text{C}$  for different reaction time, and the standard data of  $\text{Na}_5\text{Gd}_9\text{F}_{32}$  (JCPDS No. 27- 0698) as a reference.

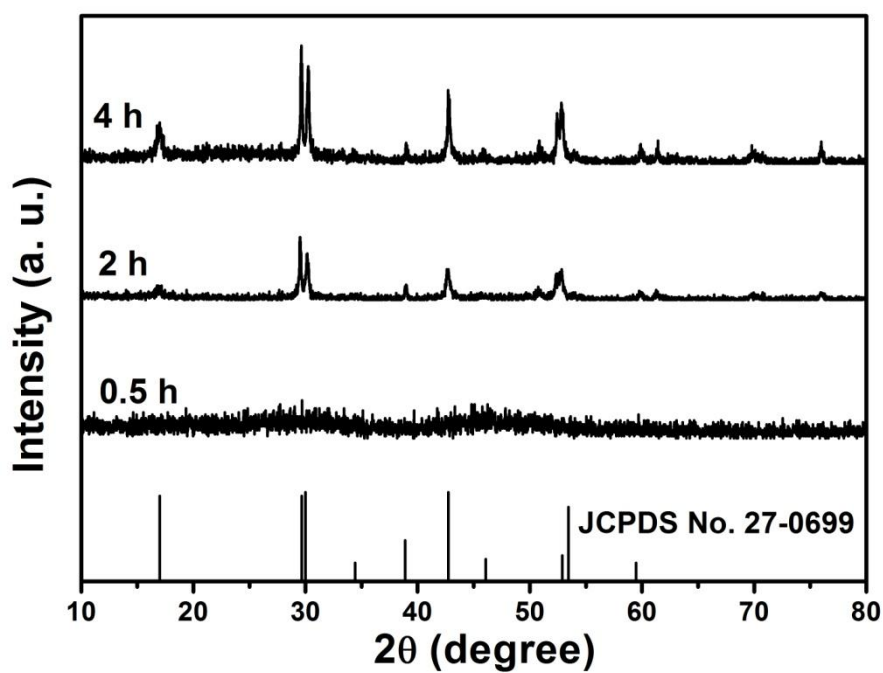

**Fig. S5** XRD patterns of the obtained NaGdF<sub>4</sub> with 6.4 mmol NaBF<sub>4</sub> and 3.2 mmol NaOH at 160 °C for different reaction time, and the standard data of NaGdF<sub>4</sub> (JCPDS No. 27-0699) as a reference.

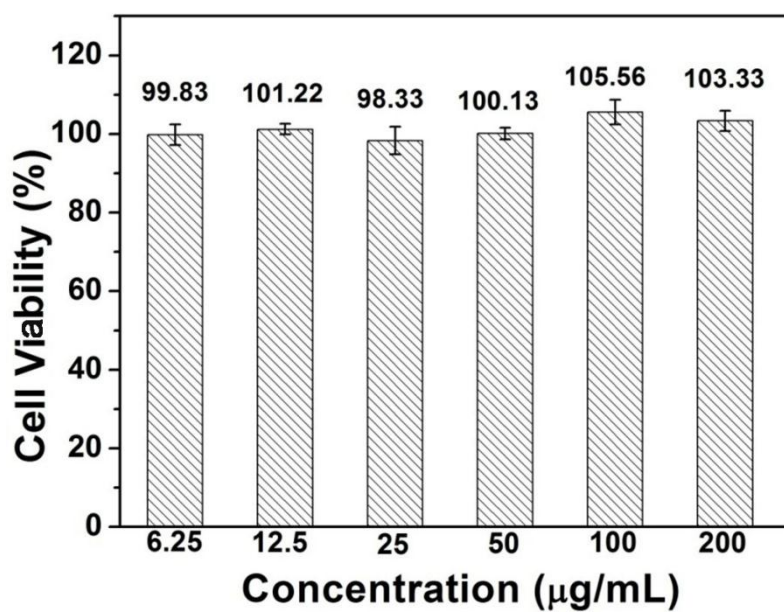

**Fig. S6** The biocompatibility of  $\beta\text{-NaGdF}_4\text{:Yb/Er}$  mesoporous microspheres analyzed using the MTT assay. L929 fibroblast cells were incubated with the samples for 24 h.



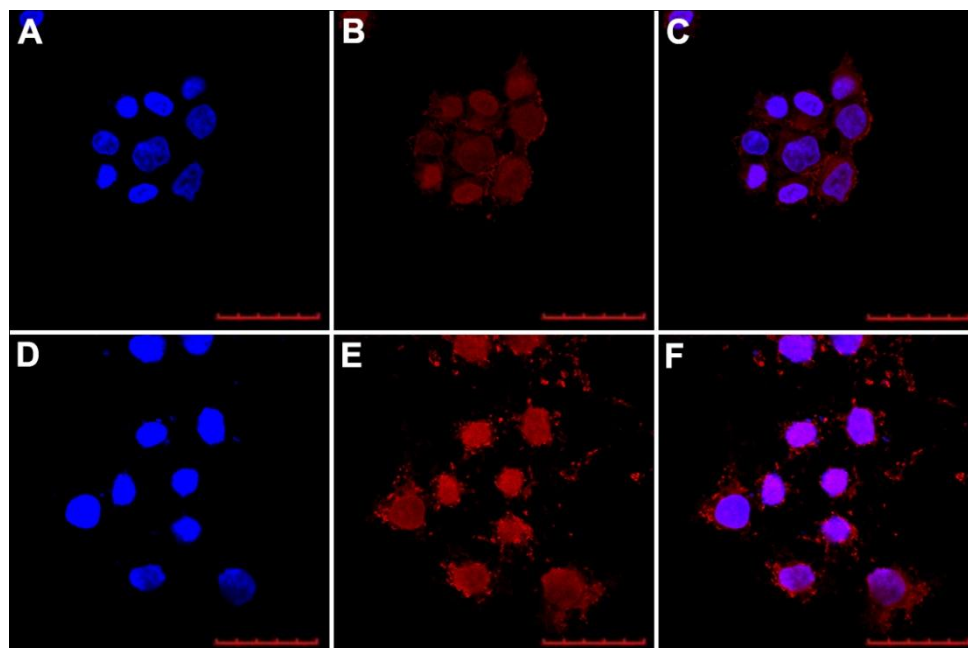

**Fig. S7** Confocal laser scanning microscopy (CLSM) images of HeLa cells incubated with  $\beta$ -NaGdF<sub>4</sub>:Yb/Er for 30 min (A–C) and 3 h (D–F) at 37 °C. For each series, images from left to right can be classified to the nuclei of respective cells (blue, being dyed by Hoechst 33324), DOX fluorescence in cells (red), and the merged images of both above. All scale bars are 50 nm.
